# Supplementary material
Source: PubMed Central journal article supplement (PMC3523338)

## Supplementary Material

### **Inactivation of thiol-dependent enzymes by hypothiocyanous acid: role of sulfenyl thiocyanate and sulfenic acid intermediates.**

Tessa J. Barrett, David I. Pattison, Stephen E. Leonard, Kate S. Carroll, Michael J. Davies and Clare L. Hawkins

**Supplementary Figure 1:** Treatment of CK with HOSCN results in generation of sulfenic acid formation at Cys-73. CK (25  $\mu\text{M}$ ) was treated with HOSCN (12.5 – 250  $\mu\text{M}$ ) for 5 min, prior to reductive alkylation, tryptic digestion and LC/MS/MS analysis. (a) No loss of the alkylated parent Cys-73 containing peptide of CK was observed (Cys-73,  $[\text{M}+3\text{H}]^{3+}$ , 1559.7.); (b) formation of the +138 product peptide corresponding to the addition of dimedone at the Cys-73 site of CK ( $[\text{M}+3\text{H}]^{3+}$ , 1586.4) was apparent. Peak areas are standardized to the area of the oxidant insensitive CK peptide SEEEYPDLISK ( $[\text{M}+2\text{H}]^{2+}$ , 598.5).

\* Represents a significant increase ( $p < 0.05$ ) in the concentration of each peptide of compared to control 1-way ANOVA with Dunnett's post-hoc test. Values are means  $\pm$  S.E.M (n = 6).

**Supplementary Figure 2:** Fragmentation ion spectra of  $[M+3H]^{3+}$  and  $[M+138+3H]^{3+}$

peptides from tryptic digests of HOSCN-treated CK. Data shown in (a) are (left-hand side) an extracted ion chromatogram obtained from the MS/MS of the triply charged species  $m/z$  1559.7 (carboxymethyl peptide), with the fragment ions specific for the Cys73 + 58 product and (right-hand side) the corresponding MS/MS spectrum. Fragment ions are doubly charged. Equivalent data are shown in (b) are (left-hand side) obtained from monitoring the specific fragment ions from the Cys73 + 138 product ( $m/z$  1586.4). Data are representative of at least five independent experiments.

**Supplementary Figure 3:** Treatment of GAPDH with HOSCN results in generation of

sulfenic acid formation at the Cys-244 position. GAPDH (25  $\mu$ M) was treated with HOSCN (12.5 – 250  $\mu$ M) for 5 min, prior to reductive alkylation, tryptic digestion and LC/MS/MS analysis. (a) No loss of the parent Cys-244 containing peptide of GAPDH was observed (Cys-244,  $[M+2H]^{2+}$ , 779.9); however (b) formation of the +138 product peptide corresponding to the addition of dimedone at the Cys-244 site of GAPDH ( $[M+2H]^{2+}$ , 819.9) was apparent. Peak areas are standardized to the area of the oxidant insensitive GAPDH peptide GAAQNIIPASTGAAK ( $[M+2H]^{2+}$ , 685.6).

\* Represents a significant increase ( $p < 0.05$ ) in the concentration of each peptide of compared to control 1-way ANOVA with Dunnett's post-hoc test. Values are means  $\pm$  S.E.M (n = 6).

**Supplementary Figure 4:** Fragmentation ion spectra of  $[M+2H]^{2+}$  and  $[M+138+2H]^{2+}$  peptides (containing Cys-244) from tryptic digests of HOSCN-treated GAPDH. Data shown in (a) are (left-hand side) an extracted ion chromatogram obtained from the MS/MS of the doubly charged species  $m/z$  779.9 (carboxymethyl peptide), with the fragment ions specific for the Cys244 + 58 species and (right-hand side) the corresponding MS/MS spectrum. Equivalent data shown in (b) are (left-hand side) obtained from monitoring the specific fragment ions from the Cys244 + 138 product,  $m/z$  819.9. Data are representative of at least five independent experiments.

### Supplementary Table 1

The [M+H]<sup>+</sup> for all Cys-containing peptides includes alkylation of the Cys residue, corresponding to a mass increase of +58 *m/z* relative to the native peptide. All identified peptides have a cross correlation score  $\geq 1$ .

| Sequence                                                | [M+H] <sup>+</sup> | Location  |
|---------------------------------------------------------|--------------------|-----------|
| LNYK                                                    | 537.6              | 11-14     |
| SEEEYPDLSK                                              | 1197.2             | 15 – 24   |
| HNNHMAK                                                 | 851.9              | 25 – 31   |
| VLTPDLYK                                                | 949.1              | 32 – 39   |
| DKETPSGFTLDDVIQTVGVDNPGHPFIMTVGC <sup>73</sup> VAGDEESY |                    |           |
| TVFK                                                    | 4677.0             | 43 – 85   |
| DLFDPIIQDR                                              | 1232.3             | 86 – 95   |
| HGGFKPTDK                                               | 987.1              | 96 – 104  |
| HKTDLNHENLK                                             | 1349.5             | 105 – 115 |
| TDLNHENLK                                               | 1084.1             | 107 – 115 |
| TDLNHENLKGDDLDPHYVLSSR                                  | 2596.8             | 107 – 129 |
| GGDDLDPHYVLSSR                                          | 1531.6             | 116 - 129 |
| GYTLPPHC <sup>145</sup> SR                              | 1189.3             | 138 – 147 |
| RAVEK                                                   | 602.7              | 151 – 155 |
| LSVEALNSLTGEFK                                          | 1508.7             | 156 – 169 |
| YYPLK                                                   | 683.8              | 172 – 176 |
| SMTEQEQQLIDDHFLFDKPVSPLLLASGMAR                         | 3647.1             | 177 – 208 |
| DWPDAR                                                  | 759.8              | 209 – 214 |

|                                            |         |           |
|--------------------------------------------|---------|-----------|
| GIWHNDNK                                   | 984.1   | 215 – 222 |
| SFLVWVNEEDHLR                              | 1644.8  | 223 – 235 |
| VISMEK                                     | 706.9   | 236 – 241 |
| RFC <sup>253</sup> VGLQK                   | 1009.2  | 251 - 258 |
| IEEIFK                                     | 778.9   | 259 - 264 |
| AGHPFMWNEHLGYVLTC <sup>282</sup> PSNLGTGLR | 2930.3  | 266 – 291 |
| LAHLSK                                     | 668.8   | 298 - 303 |
| FEEILTR                                    | 908.0   | 307 – 313 |
| RGTGGVDTAAVGSVFDISNADR                     | 2166.3  | 319 - 340 |
| LGSSEVEQVQLVVDGVK                          | 1787.01 | 341 – 357 |
| LMVEMEKK                                   | 1008.3  | 358 – 365 |
| KLEK                                       | 517.6   | 364 – 367 |
| GQSIDDMIPAQK                               | 1303.5  | 369 – 380 |

## Supplementary Table 2

The [M+H]<sup>+</sup> for all Cys-containing peptides includes alkylation of the Cys residue, corresponding to a mass increase of +58 *m/z* relative to the native peptide. All identified peptides have a cross correlation score  $\geq 1$ .

| Sequence                                          | [M+H] <sup>+</sup> | Location  |
|---------------------------------------------------|--------------------|-----------|
| VGVNGFGR                                          | 805.9              | 3-10      |
| AITIFQER                                          | 978.1              | 70 - 77   |
| AGAHLK                                            | 596.7              | 105 - 110 |
| RVIISAPSADAPMFVMGVNHEK                            | 2370.8             | 115 - 136 |
| VIISAPSADAPMFVMGVNHEK                             | 2214.6             | 116 - 136 |
| IVSNASC <sup>149</sup> TTNC <sup>153</sup> LAPLAK | 1823.0             | 143 - 159 |
| VIHDHFGIVEGLMTTVHAIATQK                           | 2620.0             | 160 - 183 |
| GAAQNIPASTGAAK                                    | 1370.5             | 198 - 212 |
| VIPELNGK                                          | 870.0              | 217 - 224 |
| LTGMAFR                                           | 795.9              | 225 - 231 |
| VPTPNVSVVDLTC <sup>244</sup> R                    | 1558.8             | 232 - 245 |
| YDDIK                                             | 653.7              | 252 - 256 |
| VVDLMVHMASK                                       | 1230.5             | 321 - 331 |
| VVDLMVHMASKE                                      | 1359.7             | 321 - 332 |

### Supplementary Table 3

MS and HPLC features of the different CK active site containing peptides observed after

HOSCN treatment on tryptic digestion.

Sequence: AGHPFMWNEHLGYVLTC<sup>282</sup>PSNLGTGLR

| Assignment               | [M+2H] <sup>2+</sup> | Retention<br>Time (min) | EIC parameters                                                                                               |
|--------------------------|----------------------|-------------------------|--------------------------------------------------------------------------------------------------------------|
| Cys <sup>282</sup> + 58  | 1465.6               | 25.5                    | 913.0-915.0, 1074.0-1076.0, 1288.0-1290.0,<br>1319.0-1321.0, 1331.0-1333.0, 1607.0-<br>1609.0, 1638.0-1640.0 |
| Cys <sup>282</sup> + 138 | 1505.6               | 28.0                    | 913.0-915.0, 969.0-971.0, 1155.0-1157.0,<br>1440.0-1442.0, 1468.0-1470.0, 1540.0-<br>1542.0, 1854.0-1856.0   |
| Cys <sup>282</sup> + 32  | 1452.6               | 25.9                    | 913.0-915.0, 1418.0-1420.0, 1889.0-1990.0                                                                    |
| Cys <sup>282</sup> + 48  | 1460.6               | 23.9                    | 502.0-504.0, 913.0-915.0, 1278.0-1280.0,<br>1373.0-1375.0, 1540.0-1542.0, 1639.0-<br>1641.0, 1752.0-1754.0   |

### Supplementary Table 4

MS and HPLC features of the different GAPDH active site containing peptides observed after HOSCN treatment on tryptic digestion.

Sequence: IVSNASC<sup>149</sup>TTNC<sup>153</sup>LAPLAK

| Assignment                | [M+2H] <sup>2+</sup> | Retention<br>Time (min) | EIC parameters                                                                    |
|---------------------------|----------------------|-------------------------|-----------------------------------------------------------------------------------|
| Cys <sup>149</sup> + 58,  | 912.0                | 18.1                    | 427.0-429.0, 498.0-500.0, 772.0-                                                  |
| Cys <sup>153</sup> + 58   |                      |                         | 774.0, 1088.0-1090.0, 1249.0-1251.0,<br>1336.0-1338.0, 1393.0-1395.0              |
| Cys <sup>149</sup> + 138, | 952.0                | 21.1                    | 988.0-990.0, 1089.0-1091.0, 1015.0-                                               |
| Cys <sup>153</sup> + 58   |                      |                         | 1017.0                                                                            |
| Cys <sup>149</sup> + 32,  | 899.0                | 17.0                    | 706.0-708.0, 772.0-774.0, 807.0-                                                  |
| Cys <sup>153</sup> + 58   |                      |                         | 809.0, 887.0-889.0, 907.0-909.0,<br>988.0-990.0, 1023.0-1025.0, 1088.0-<br>1090.0 |
| Cys <sup>149</sup> + 48,  | 907.0                | 15.9                    | 722.0-724.0, 772.0-774.0, 823.0-                                                  |
| Cys <sup>153</sup> + 58   |                      |                         | 825.0, 887.0-889.0, 924.0-926.0,<br>988.0-990.0, 1089.0-1091.0                    |



### Supplementary Table 5

Parameters associated with CK and GAPDH identification from excised gel bands.

| <b>Identity</b> | <b>Matched Peptides</b> | <b>Sequence Coverage (%)</b> | <b>M<sub>r</sub></b> | <b>Swiss-Prot ID</b> |
|-----------------|-------------------------|------------------------------|----------------------|----------------------|
| GAPDH           | 11                      | 47                           | 35810                | P16858               |
| CK              | 7                       | 23                           | 42714                | Q0447                |

Supplementary Figure 1

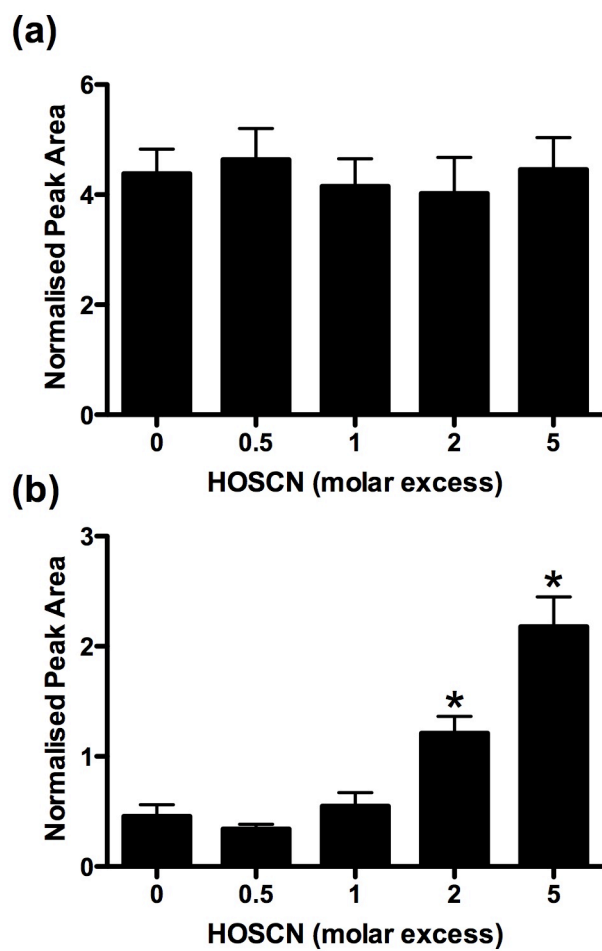

## Supplementary Figure 2

(a) Cys73 + 58

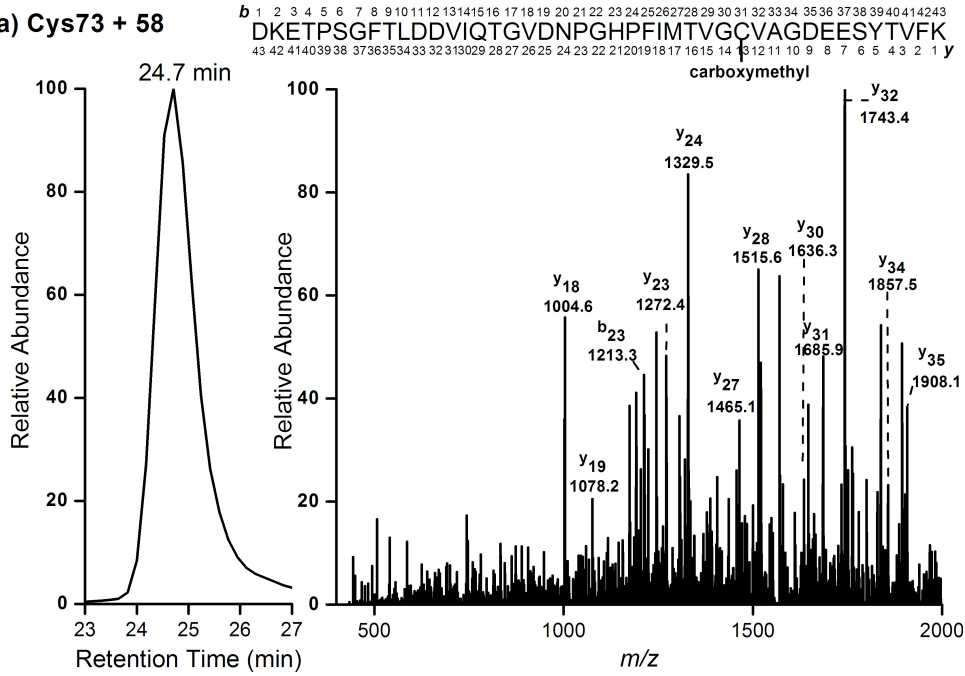

(b) Cys73 + 138

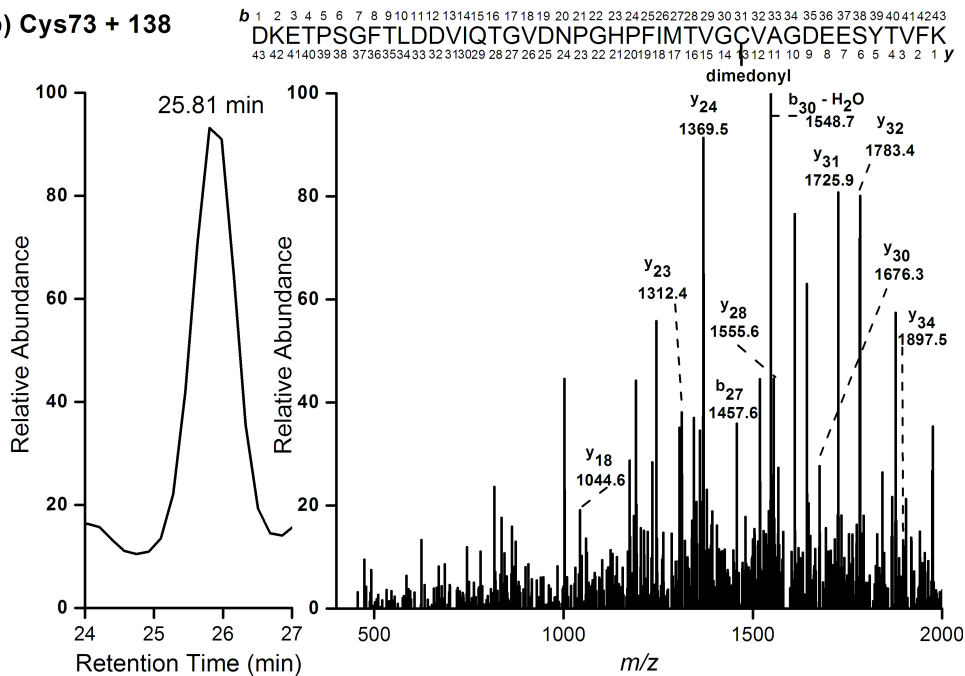

### Supplementary Figure 3

(a)

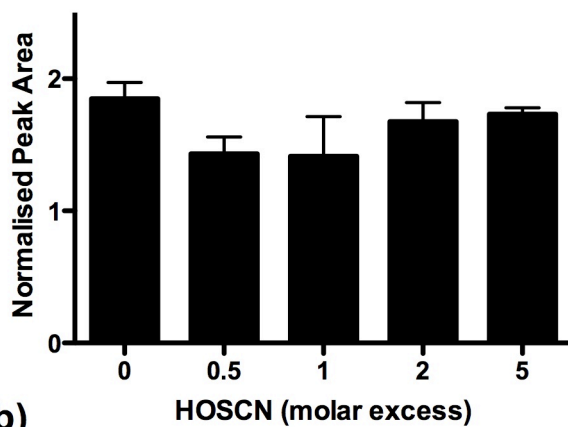

(b)

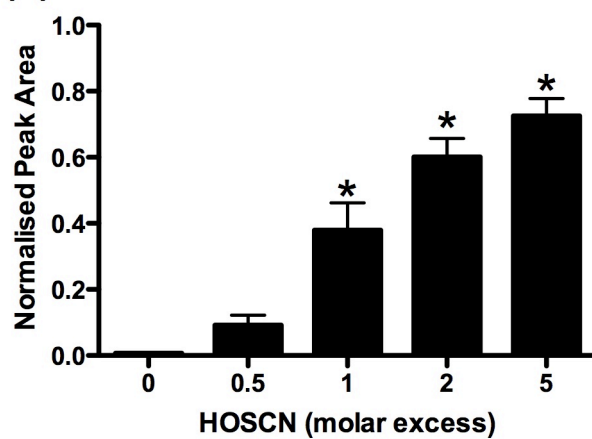

### Supplementary Figure 4

(a) Cys244 + 58

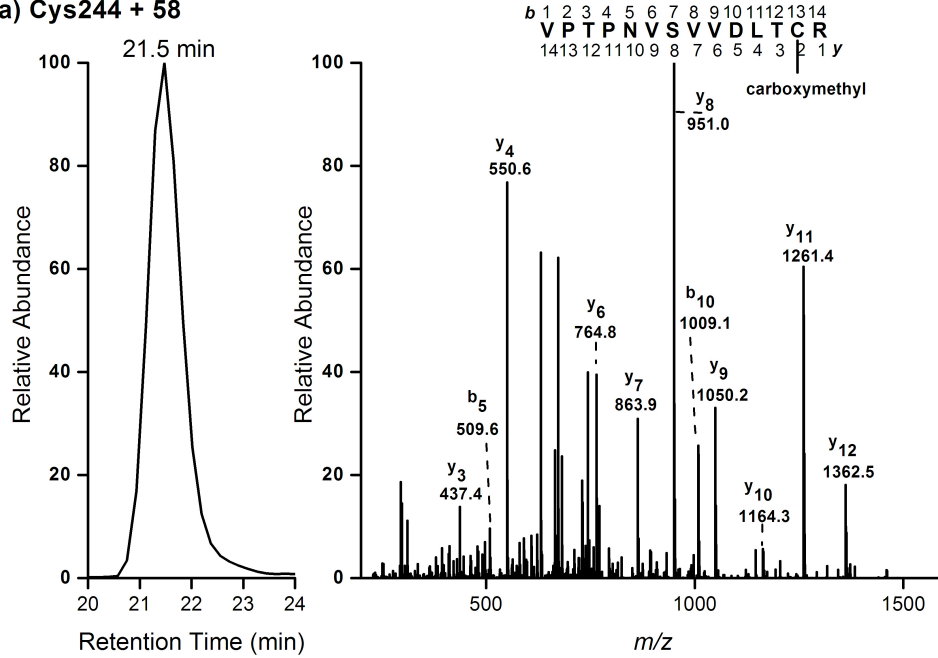

(b) Cys244 + 138

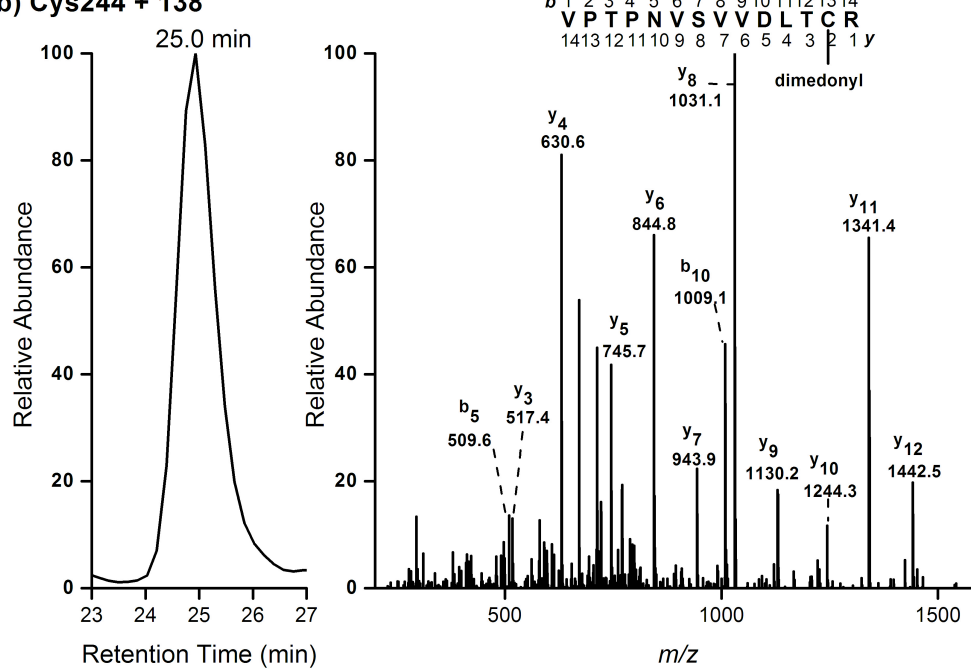

Supplement: NIHMS427140-supplement-SI.pdf [file NIHMS427140-supplement-SI.pdf]
